# Supplementary material for: Liver Kinase B1 Is Required for White Adipose Tissue Growth and Differentiation
Source: PubMed Central journal article supplement — Diabetes. 2013 Jun 14;62(7):2347–58. doi: 10.2337/db12-1229 (PMC3712073; doi:10.2337/db12-1229), 2013-06-14

SUPPLEMENTARY DATA

**Supplementary Figure 1.** LKB1 deletion in adipose tissue does not affect the histological structure of heart and liver. Heart and liver from 18-day old male WT and its *LKB1<sup>ad-/-</sup>* littermate, were stained with hematoxylin and eosin (H&E). Scale bar = 50  $\mu$ m.

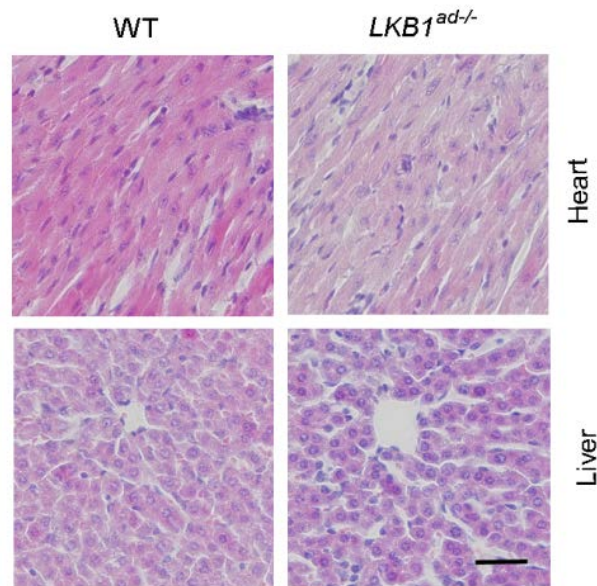

**Supplementary Figure 2.** LKB1 deletion in adipose tissue does not affect HMG CoA reductase level in the liver. RT-PCR to detect the mRNA level of HMG CoA reductase from WT and *LKB1<sup>ad-/-</sup>* livers (n=4).

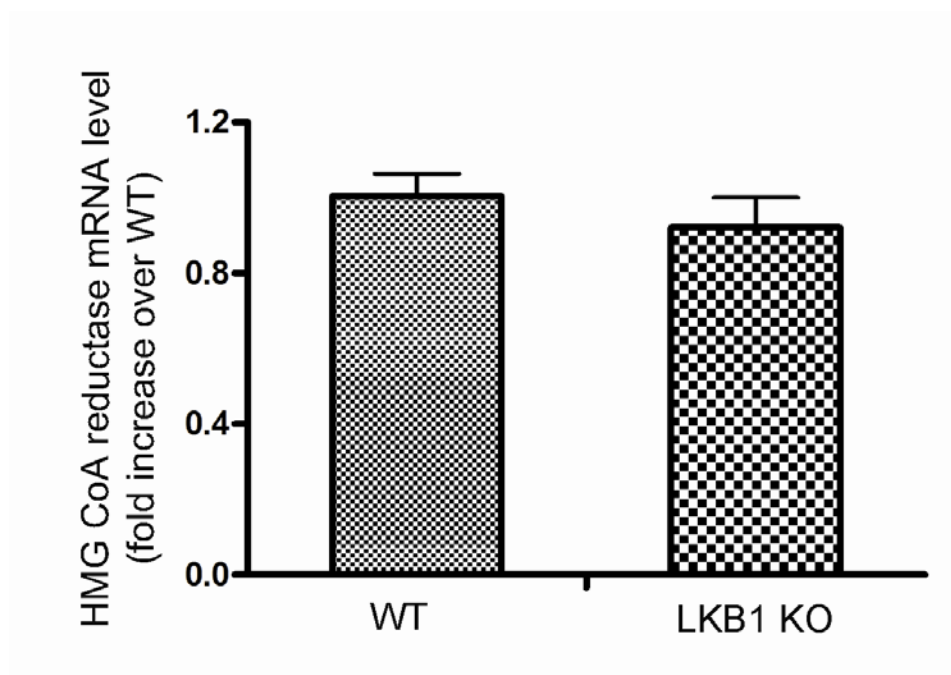

Supplement: supp_db12-1229_DB121229SupplementaryData.pdf [file supp_db12-1229_DB121229SupplementaryData.pdf]
